# Supplementary material for: Attention impairments and ADHD symptoms in adult narcoleptic patients with and without hypocretin deficiency
Source: PLoS One. 2017 Aug 1;12(8):e0182085. doi: 10.1371/journal.pone.0182085 (PMC5538711; doi:10.1371/journal.pone.0182085)
Supplement: S1 Dataset — (XLSX) [file pone.0182085.s001.xlsx]

## Sheet: redame
Population	21 Narcolepsy Type 1 patients, 9 males, with a mean age (SD) of 36.19y (11.94 y); 15 Narcolepsy Type 2 patients, 6 males, with a mean age (SD) of 35.53y (12.95y) and 22 healthy controls, 11 males, with a mean age (SD) of 34.95y (11.52y). Diagnosis was performed according to current International Classification of Sleep Disorders 3rd edition (ICSD-3) criteria.
Type of data	Questionnaire and reaction times at the Attention Network Test (ANT)
Sampling procedure	Narcolepsy Type 1 and Narcolepsy Type 2 completed the cognitive task during diagnostic hospitalization. In the first day were instructed on study protocol and practiced with the task. In the second day, the test was administered at fixed hour (17:30). Healthy controls underwent the same experimental protocol, participants were evaluated at the laboratory of applied chronopsychology, Department of…
Data collection method	Questionnaires and computerized cognitive task
Constructed and derived variables	Information reported in the 'variables' tab

## Sheet: variables
VARIABLE NAME	EXPLANATION/QUESTION	REF
SUB	Participant number
AGE	Age in years
SEX	Sex, male = 1, female = 2
BMI	Body Mass Index
DIAGNOSIS	NT1 = Narcolepsy Type 1, NT2 = Narcolepsy Type 2, HC= Healthy controls
HLA DQB1*0602	HLA DQB1*0602 positive = 1, HLA DQB1*0602 negative = 0, N/A = not available
HCTR-1	Cerebrospinal Fluid Hypocretin-1 levels, N/A = not available
MSLT-SOL	Mean sleep latency (min) at the Multiple Sleep Latency Test (MSLT)
MSLT-SOREMPs	Mean number of sleep onset REM periods at the Multiple Sleep Latency Test (MSLT)
ESS	Epworth Sleepiness Scale ,Sum Score
BDI	Beck Depression Inventory, Sum Score
STAI-S	State-Trait Anxiety Inventory, State anxiety Score
STAI-T	State-Trait Anxiety Inventory, Trait anxiety Score
OCIr	Obsessive-Compulsive Inventory - Revised , Sum Score	Sica C, Ghisi M, Altoè G, Chiri LR, Franceschini S, Coradeschi D, et al. The Italian version of the obsessive compulsive inventory: its psychometric properties on community and clinical samples. J Anxiety Disord 2009;23:204–11.
ASRS-In	Adult ADHD Self-Report Scale Symptom Checklist (ASRS-v1.1), Inattentive Score	Kessler RC, Adler L, Ames M, Demler O, Faraone S, Hiripi E, et al. The World Health Organization Adult ADHD Self-Report Scale (ASRS): a short screening scale for use in the general population. Psychol Med 2005;35:245–56.
ASRS-Hy	Adult ADHD Self-Report Scale Symptom Checklist (ASRS-v1.1), Hyperactive Score	Kessler RC, Adler L, Ames M, Demler O, Faraone S, Hiripi E, et al. The World Health Organization Adult ADHD Self-Report Scale (ASRS): a short screening scale for use in the general population. Psychol Med 2005;35:245–56.
ASRS-Scr	Adult ADHD Self-Report Scale Symptom Checklist (ASRS-v1.1), Sum-score of items 1 to 6	Kessler RC, Adler LA, Gruber MJ, Sarawate CA, Spencer T, Van Brunt DL. Validity of the World Health Organization Adult ADHD Self-Report Scale (ASRS) Screener in a representative sample of health plan members. Int J Methods Psychiatr Res 2007;16:52–65.
CIRCADIAN TYPOLOGY	Circadian Typology at the reduced version of the Morningness-Eveningness Questionnaire (r-MEQ), MT = morning-type, NT = neither-type, ET= evening-type	Natale V, Esposito MJ, Martoni M, Fabbri M (2006). Validity of the reduced version of the Morningness–Eveningness Questionnaire. Sleep Biol Rhythms 2006;4:72–4.
RT-ALL	Average of the mean reaction time of all 12 combinations of the 4 cue conditions and the 3 flanker conditions	Urbanek C, Weinges-Evers N, Bellmann-Strobl J, Bock M, Dörr J, Hahn E, et al. Attention Network Test reveals alerting network dysfunction in multiple sclerosis. Mult Scler 2010;16:93–9.
RT-NOCUE	Mean reaction time in no-cue condition
RT-DOUBLECUE	Mean reaction time in double-cue condition
RT-CENTERCUE	Mean reaction time in center-cue condition
RT-SPATIALCUE	Mean reaction time in spatial-cue condition
RT-CONGRUENT FLANKER	Mean reaction time in congruent flanker condition
RT-INCONGRUENT FLANKER	Mean reaction time in incongruent flanker condition
RT-NEUTRAL FLANKER	Mean reaction time in neutral flanker condition
ALERTING NETWORK SCORE	Mean reaction time in no-cue condition – mean reaction time in double-cue condition (RTno cue – RTdouble cue)	Fan J, McCandliss BD, Sommer T, Raz A, Posner MI. Testing the efficiency and independence of attentional networks. J Cogn Neurosci 2002;14:340–7.
ORIENTING NETWORK SCORE	Mean reaction time in center-cue condition – mean reaction time in spatial-cue condition (RTcenter cue – RTspatial cue)	Fan J, McCandliss BD, Sommer T, Raz A, Posner MI. Testing the efficiency and independence of attentional networks. J Cogn Neurosci 2002;14:340–7.
EXECUTIVE NETWORK SCORE	Mean reaction time in incongruent flanker condition – mean reaction time in congruent flanker condition (RTincongruent flanker − RTcongruent flanker)	Fan J, McCandliss BD, Sommer T, Raz A, Posner MI. Testing the efficiency and independence of attentional networks. J Cogn Neurosci 2002;14:340–7.
ALERTING PROPORTIONAL SCORE	Alerting network score divided by RT-ALL	Urbanek C, Weinges-Evers N, Bellmann-Strobl J, Bock M, Dörr J, Hahn E, et al. Attention Network Test reveals alerting network dysfunction in multiple sclerosis. Mult Scler 2010;16:93–9.
ORIENTING PROPORTIONAL SCORE	Orienting network score divided by RT-ALL	Urbanek C, Weinges-Evers N, Bellmann-Strobl J, Bock M, Dörr J, Hahn E, et al. Attention Network Test reveals alerting network dysfunction in multiple sclerosis. Mult Scler 2010;16:93–9.
EXECUTIVE PROPORTIONAL SCORE	Executive network score divided by RT-ALL	Urbanek C, Weinges-Evers N, Bellmann-Strobl J, Bock M, Dörr J, Hahn E, et al. Attention Network Test reveals alerting network dysfunction in multiple sclerosis. Mult Scler 2010;16:93–9.

## Sheet: data
SUB	AGE	SEX	BMI	DIAGNOSIS	HLA DQB1*0602	HCTR-1	MSLT-SOL	MSLT-SOREMPs	ESS	BDI	STAI-S	STAI-T	OCIr	ASRS-In	ASRS-Hy	ASRS-Scr	CIRCADIAN TYPOLOGY	RT-ALL	RT-NOCUE	RT-DOUBLECUE	RT-CENTERCUE	RT-SPATIALCUE	RT-CONGRUENT FLANKER	RT-INCONGRUENT FLANKER	RT-NEUTRAL FLANKER	ALERTING NETWORK SCORE	ORIENTING NETWORK SCORE	EXECUTIVE NETWORK SCORE	ALERTING PROPORTIONAL SCORE	ORIENTING PROPORTIONAL SCORE	EXECUTIVE PROPORTIONAL SCORE
1	29	1	22.66	NT1	N/A	0	1.4	0	10	0	49	42	13	16	23	14	ET	564.59	624.28	544.41	551.33	537.11	567.89	607.68	516.87	79.87	14.22	39.79	0.141465	0.0251864	0.0704759
2	35	1	35.06	NT1	1	0	2.6	5	12	13	36	42	11	12	10	8	NT	636.07	669.74	644.27	641.5	587.33	620.58	663.23	623.13	25.47	54.17	42.65	0.0400428	0.0851636	0.0670524
3	36	1	31.35	NT1	1	0	0.36	5	22	25	48	54	0	21	20	16	MT	612.56	671.04	590.13	616.44	574.4	589.85	642.51	603.91	80.91	42.04	52.66	0.132085	0.06863	0.0859671
4	37	2	33.98	NT1	1	49.1	20	0	21	11	67	56	48	17	13	12	NT	1026.83	1082.33	1003.47	1040.91	973	1076.1	1061.77	941.9	78.86	67.91	-14.33	0.0767995	0.0661356	-0.0139556
5	27	2	17.58	NT1	1	43.1	7.7	3	15	20	35	62	20	18	16	8	MT	489.35	540.94	466.65	481.85	467.94	476.11	535.36	456.56	74.29	13.91	59.25	0.151814	0.0284255	0.121079
6	45	1	32.53	NT1	1	68.2	1.4	5	19	9	33	37	3	7	9	6	NT	550.38	579.47	545.3	544.33	528.15	539.45	595.8	515.33	34.17	16.18	56.35	0.0620844	0.0293979	0.102384
7	20	2	40.4	NT1	0	0	1.3	5	18	9	37	34	13	20	19	11	ET	572.27	615.11	538.72	589.36	543.57	554.69	600.12	561.62	76.39	45.79	45.43	0.133486	0.0800147	0.0793856
8	66	2	29.73	NT1	1	109.1	15.36	4	22	9	37	38	16	24	3	9	NT	615.56	639.71	606.47	642.38	572.6	638.9	634.56	572.66	33.24	69.78	-4.34	0.0539996	0.11336	-0.00705049
9	27	2	23.95	NT1	1	0	3.7	5	10	18	48	57	2	21	15	11	NT	496.71	574.73	458.17	474.43	476.61	476.4	550.67	459.15	116.56	-2.18	74.27	0.234664	-0.00438888	0.149524
10	33	2	30.83	NT1	1	32.5	0.7	5	15	24	65	53	30	13	16	11	NT	660.43	724.51	620.67	674.33	614.77	664.32	739.9	572.62	103.84	59.56	75.58	0.157231	0.0901837	0.114441
11	32	1	27.78	NT1	1	83.4	4.52	3	24	55	74	80	47	36	28	24	NT	637.98	673.91	634.91	640.36	593.35	622.56	719.98	569.57	39	47.01	97.42	0.0611304	0.0736857	0.152701
12	58	1	39.2	NT1	1	0	2.12	3	6	2	34	30	28	9	12	4	NT	664.04	734.26	637.4	653.11	627	668.98	699.5	622.49	96.86	26.11	30.52	0.145865	0.0393199	0.0459611
13	36	1	30.48	NT1	1	20	1.8	4	23	16	61	54	14	20	12	14	ET	693.98	722.58	690.57	684.91	677.44	688.61	722.28	673.16	32.01	7.47	33.67	0.0461252	0.010764	0.0485172
14	24	2	21.5	NT1	1	0	2	4	14	25	42	32	31	23	15	15	ET	674.33	738.48	619.7	706.09	627.72	694.49	698.77	627.38	118.78	78.37	4.28	0.176145	0.116219	0.00634704
15	50	2	35.76	NT1	1	84.2	3.43	5	11	14	46	54	11	23	18	15	NT	575.91	629.85	544.94	573.53	552.74	591.7	591.73	542.8	84.91	20.79	0.03	0.147436	0.0360994	5.20915e-05
16	32	2	38.47	NT1	1	0	2.5	5	8	4	30	34	6	14	7	6	NT	658.36	693.07	617.78	695.98	626.7	656.81	708.78	609.89	75.29	69.28	51.97	0.11436	0.105231	0.0789386
17	37	2	29.69	NT1	1	0	4.4	4	14	19	59	54	25	18	14	9	NT	646.27	693.19	639.85	639.4	610.02	655.5	702.55	580.77	53.34	29.38	47.05	0.0825352	0.0454609	0.0728024
18	49	2	33.09	NT1	1	0	4.24	3	19	15	32	36	12	17	18	14	NT	559.36	581.1	557.46	570	529.1	568.91	569.16	540.17	23.64	40.9	0.25	0.0422626	0.0731193	0.000446939
19	30	1	32.41	NT1	1	0	3	4	12	0	25	24	26	5	13	8	MT	651.27	707.98	590.44	678.47	621.96	638.63	712.39	600.31	117.54	56.51	73.76	0.180478	0.0867689	0.113256
20	39	2	32.27	NT1	1	0	5.4	3	21	39	52	66	25	16	18	9	NT	596.17	606.4	590.6	611.09	571.72	578.32	643.27	565.21	15.8	39.37	64.95	0.0265025	0.0660382	0.108945
21	18	1	19.88	NT1	1	0	4.7	3	18	27	63	65	11	20	12	8	ET	481.3	501.47	491	486.11	444.26	469.02	525.74	450.03	10.47	41.85	56.72	0.0217536	0.086952	0.117847
22	29	2	28.63	NT2	1	316.6	7.2	3	18	3	36	37	9	17	16	8	MT	624.88	669.36	595.7	636.47	604.79	600.6	687.08	591.71	73.66	31.68	86.48	0.117879	0.0506977	0.138395
23	34	2	24.57	NT2	N/A	132	8.12	2	11	19	51	49	19	22	15	9	MT	650.49	688.11	653.21	647.5	612.36	646.25	724.2	579.82	34.9	35.14	77.95	0.0536519	0.0540208	0.119833
24	31	2	22.67	NT2	1	316.05	7.56	2	15	6	39	42	13	17	14	13	NT	571.83	613.8	549.1	581.25	544.04	572.75	612.25	530.27	64.7	37.21	39.5	0.113146	0.0650718	0.0690765
25	18	2	21.77	NT2	1	329.3	7.2	2	6	25	46	54	1	9	7	7	NT	587.37	618.68	602.93	587.9	540.67	587.16	617.71	556.53	15.75	47.23	30.55	0.0268144	0.0804093	0.0520115
26	40	2	24.57	NT2	0	367.4	6.3	1	16	32	64	68	25	24	19	12	ET	751.33	788.42	713.04	779.45	718.04	715.33	839.46	699.48	75.38	61.41	124.13	0.100329	0.0817351	0.165214
27	18	1	28.08	NT2	1	343.3	3.2	4	14	37	62	68	18	36	27	20	NT	510.99	524.59	535.55	493.46	491.09	516.19	516.12	501.24	-10.96	2.37	-0.07	-0.0214486	0.00463806	-0.000136989
28	40	1	22.94	NT2	0	391.7	6.6	2	14	19	58	60	11	23	11	11	NT	468.59	502.16	478.25	478.7	412.43	464.36	507.97	431.71	23.91	66.27	43.61	0.0510254	0.141424	0.0930664
29	25	1	25.1	NT2	N/A	228.3	5.6	5	24	8	33	25	18	9	12	7	NT	425.39	471.73	402.79	423.18	390.6	410.28	465.4	393.68	68.94	32.58	55.12	0.162063	0.0765885	0.129575
30	67	1	26.45	NT2	N/A	N/A	6.24	2	19	4	25	25	3	5	9	6	NT	658.06	666.02	648.71	669.81	646.58	643.98	701.84	627.73	17.31	23.23	57.86	0.0263046	0.0353007	0.0879251
31	45	2	23.51	NT2	0	276.87	3.3	2	20	32	32	49	13	0	9	9	NT	770.62	802.91	778.49	766.11	737.77	769.53	831.77	713.54	24.42	28.34	62.24	0.0316888	0.0367756	0.0807661
32	52	2	25.78	NT2	0	428.31	6.8	2	22	4	31	31	11	18	9	10	MT	626.67	640.05	599.58	647.82	576.53	616.15	680.91	580.59	40.47	71.29	64.76	0.0645794	0.11376	0.10334
33	38	1	24.2	NT2	1	513	4.36	3	4	26	44	59	26	28	14	14	NT	468.59	489.45	475.11	459.15	450.04	473.71	474.83	456.17	14.34	9.11	1.12	0.0306024	0.0194413	0.00239015
34	28	1	26.51	NT2	1	N/A	6.12	2	18	18	54	56	7	31	19	16	NT	451.22	464.64	456.38	443	439.29	449.6	473.13	430.43	8.26	3.71	23.53	0.0183059	0.00822215	0.0521475
35	41	2	32.87	NT2	0	294	8	2	14	3	40	36	42	18	16	12	MT	742.69	797.96	746.52	744.26	682.28	754.27	759.58	714.56	51.44	61.98	5.31	0.0692617	0.0834534	0.00714969
36	27	2	23.03	NT2	0	410.1	4.36	4	18	8	48	53	14	20	10	15	NT	799.5	813.1	805.63	747.78	785.8	792.83	903.53	706.59	7.47	-38.02	110.7	0.00934334	-0.0475547	0.138462
37	54	2	18.75	HC					11	4	40	32	7	9	8	6	NT	549.47	612.7	544.85	551.91	488.83	536.58	590.02	523.03	67.85	63.08	53.44	0.123483	0.114802	0.0972574
38	24	2	18.78	HC					0	9	49	52	13	13	16	6	NT	426.89	447.54	433.3	434.39	391.26	418.92	470.03	392.55	14.24	43.13	51.11	0.0333575	0.101033	0.119726
39	30	2	25.78	HC					8	21	42	52	3	18	16	5	NT	479.26	529.78	467.52	481	440.21	478.13	492.9	466.38	62.26	40.79	14.77	0.129909	0.0851104	0.0308183
40	37	2	23.9	HC					4	9	47	47	22	9	22	4	NT	536.33	596.16	523.98	545.36	478.35	506.06	595.5	504.25	72.18	67.01	89.44	0.134581	0.124942	0.166763
41	37	1	19.95	HC					3	2	26	32	7	9	12	4	NT	441.86	471.77	437.42	446.15	412.1	441.81	465.38	418.39	34.35	34.05	23.57	0.0777396	0.0770606	0.0533427
42	44	1	26.6	HC					5	9	52	45	29	19	13	3	NT	482.48	507.98	466.83	474.52	479.82	440.39	558.1	448.87	41.15	-5.3	117.71	0.0852885	-0.0109849	0.243969
43	52	2	19.4	HC					7	1	30	29	16	11	6	7	NT	579.08	635.91	568.28	618.26	492.4	584.97	608.77	541.24	67.63	125.86	23.8	0.116789	0.217345	0.0410997
44	25	1	23	HC					12	3	29	30	7	14	9	6	NT	458.73	470.09	458.96	451.79	450.3	432.97	523.23	419.6	11.13	1.49	90.26	0.0242626	0.0032481	0.196761
45	29	1	26.83	HC					5	16	57	57	14	12	10	8	ET	475.97	501.82	478.35	482.89	437.92	457.88	522.54	445.71	23.47	44.97	64.66	0.0493098	0.0944807	0.135849
46	33	1	23	HC					8	13	38	36	7	8	4	9	MT	517.6	545.8	525.21	530.2	464.77	503.57	568.62	478.19	20.59	65.43	65.05	0.0397798	0.12641	0.125676
47	32	2	18.03	HC					7	5	26	32	9	6	6	13	NT	510.97	522.35	511.1	521.11	481.28	487.06	585.81	459.64	11.25	39.83	98.75	0.0220169	0.0779498	0.19326
48	21	1	22.21	HC					13	11	35	39	9	7	12	4	NT	524.95	547.26	523.47	542.22	488.3	491.92	586.4	496.98	23.79	53.92	94.48	0.0453186	0.102715	0.179979
49	25	2	18.3	HC					9	19	43	52	11	12	11	6	ET	465.9	502.06	455.23	461.96	433.83	466.68	476.18	455.95	46.83	28.13	9.5	0.100515	0.0603778	0.0203906
50	29	2	26.26	HC					2	7	36	36	2	10	14	5	NT	490.06	524.07	489.3	509.52	439.19	475.63	547.32	446.44	34.77	70.33	71.69	0.0709505	0.143513	0.146288
51	24	1	23.55	HC					9	3	52	42	4	9	7	4	NT	446.23	483.16	453.7	456.98	382.23	442.83	465.9	427.61	29.46	74.75	23.07	0.0660198	0.167515	0.0516998
52	54	2	17.4	HC					6	8	32	33	13	5	19	4	NT	619.44	633.48	618.15	625.42	601.63	615.33	655.38	587.87	15.33	23.79	40.05	0.0247482	0.0384057	0.0646552
53	41	1	25.6	HC					4	8	51	47	15	14	14	0	NT	526.65	554.96	525.02	515.48	509.48	518.09	562.65	498.2	29.94	6	44.56	0.0568499	0.0113928	0.0846103
54	28	2	18	HC					8	14	30	50	35	13	5	10	NT	559.62	585.96	558.4	554.85	538.15	566.13	577.78	534.55	27.56	16.7	11.65	0.0492477	0.0298417	0.0208177
55	24	1	21.8	HC					9	3	42	47	10	13	7	8	NT	446.92	470.7	449.87	456	408.17	428.41	483.98	426.61	20.83	47.83	55.57	0.0466079	0.107021	0.12434
56	44	1	23.5	HC					12	5	36	33	1	10	14	8	ET	452.57	477.6	449.77	469.67	410.32	434.7	504.48	419.08	27.83	59.35	69.78	0.0614932	0.13114	0.154186
57	58	1	19.53	HC					7	7	39	43	7	12	10	5	NT	579.03	603.79	586.71	570.87	553.72	584.84	595.29	556.7	17.08	17.15	10.45	0.0294976	0.0296185	0.0180474
58	24	2	21.26	HC					6	2	24	20	8	1	2	5	NT	477.75	517.89	481.7	486.74	433.36	459.31	525.56	448.48	36.19	53.38	66.25	0.0757509	0.111732	0.138671
